# Supplementary material for: Exploration of Experiences and Perpetration of Identity-Based Bullying Among Adolescents by Race/Ethnicity and Other Marginalized Identities
Source: PubMed Central journal article supplement (PMC8303093; doi:10.1001/jamanetworkopen.2021.16364), 2021-07-23
Supplement: jamanetwopen-e2116364-s001.pdf [file jamanetwopen-e2116364-s001.pdf]

## Supplemental Online Content

Galán CA, Stokes LR, Szoko N, Abebe KZ, Culyba AJ. Exploration of experiences and perpetration of identity-based bullying among adolescents by race/ethnicity and other marginalized identities. *JAMA Netw Open.* 2021;4(7):e2116364.  
doi:10.1001/jamanetworkopen.2021.16364

**eTable.** Patterns of Experiences of IBB and IBB Perpetration Endorsed by Participants

This supplemental material has been provided by the authors to give readers additional information about their work.

**eTable.** Patterns of Experiences of IBB and IBB Perpetration Endorsed by Participants

| Race, ethnicity, or national origin | Religion | Sexual orientation | Gender | Physical or mental disability | Immigration Status | Other Reason | Number reporting this combination of IBB victimization <sup>a</sup> | Number reporting this combination of IBB perpetration <sup>a</sup> |
|-------------------------------------|----------|--------------------|--------|-------------------------------|--------------------|--------------|---------------------------------------------------------------------|--------------------------------------------------------------------|
|                                     |          |                    |        |                               |                    |              | 2434                                                                | 2631                                                               |
|                                     |          |                    |        |                               |                    |              | 616                                                                 | 445                                                                |
|                                     |          |                    |        |                               |                    |              | 269                                                                 | 169                                                                |
|                                     |          |                    |        |                               |                    |              | 134                                                                 | 109                                                                |
|                                     |          |                    |        |                               |                    |              | 103                                                                 | 47                                                                 |
|                                     |          |                    |        |                               |                    |              | 82                                                                  | 63                                                                 |
|                                     |          |                    |        |                               |                    |              | 37                                                                  | 47                                                                 |
|                                     |          |                    |        |                               |                    |              | 36                                                                  | 29                                                                 |
|                                     |          |                    |        |                               |                    |              | 27                                                                  | 0                                                                  |
|                                     |          |                    |        |                               |                    |              | 24                                                                  | 0                                                                  |
|                                     |          |                    |        |                               |                    |              | 15                                                                  | 0                                                                  |
|                                     |          |                    |        |                               |                    |              | 15                                                                  | 0                                                                  |
|                                     |          |                    |        |                               |                    |              | 12                                                                  | 0                                                                  |
|                                     |          |                    |        |                               |                    |              | 9                                                                   | 0                                                                  |
|                                     |          |                    |        |                               |                    |              | 9                                                                   | 0                                                                  |
|                                     |          |                    |        |                               |                    |              | 8                                                                   | 0                                                                  |
|                                     |          |                    |        |                               |                    |              | 7                                                                   | 0                                                                  |
|                                     |          |                    |        |                               |                    |              | 7                                                                   | 0                                                                  |
|                                     |          |                    |        |                               |                    |              | 6                                                                   | 0                                                                  |
|                                     |          |                    |        |                               |                    |              | 6                                                                   | 0                                                                  |
|                                     |          |                    |        |                               |                    |              | 6                                                                   | 0                                                                  |
|                                     |          |                    |        |                               |                    |              | 6                                                                   | 0                                                                  |
|                                     |          |                    |        |                               |                    |              | 5                                                                   | 0                                                                  |
|                                     |          |                    |        |                               |                    |              | 0                                                                   | 9                                                                  |

<sup>a</sup> Patterns endorsed by <5 participants are not included in the table.
